# Supplementary material for: Contrasting seasonal drivers of virus abundance and production in the North Pacific Ocean
Source: PubMed Central journal article supplement (PMC5589214; doi:10.1371/journal.pone.0184371), 2017-09-07
Supplement: pone.0184371.s001.pdf [file pone.0184371.s001.pdf]

|                      |                                  | WINTER           |         |                   |         | SUMMER           |         |                   |         |
|----------------------|----------------------------------|------------------|---------|-------------------|---------|------------------|---------|-------------------|---------|
|                      |                                  | <u>Abundance</u> |         | <u>Production</u> |         | <u>Abundance</u> |         | <u>Production</u> |         |
|                      |                                  | r <sub>s</sub>   | P-value | r <sub>s</sub>    | P-value | r <sub>s</sub>   | P-value | r <sub>s</sub>    | P-value |
| Physical             | Latitude                         | 0.743            | < 0.001 | - 0.139           | 0.681   | 0.647            | < 0.001 | - 0.077           | 0.785   |
|                      | Temperature                      | -0.794           | < 0.001 | 0.188             | 0.583   | - 0.809          | < 0.001 | 0.024             | 0.928   |
|                      | Salinity                         | 0.740            | < 0.001 | 0.127             | 0.707   | - 0.814          | < 0.001 | 0.215             | 0.469   |
|                      | pH                               | -0.768           | < 0.001 | 0.127             | 0.707   | - 0.638          | 0.002   | 0.213             | 0.469   |
|                      | K <sub>d</sub>                   | 0.809            | < 0.001 | 0.188             | 0.583   | 0.504            | 0.014   | 0.091             | 0.751   |
| Biological           | Viral Production                 | -0.070           | 0.844   | ---               | ----    | -0.165           | 0.578   | ----              | ----    |
|                      | <i>Prochlorococcus</i> abundance | -0.068           | 0.001   | 0.433             | 0.917   | -0.575           | <0.001  | 0.024             | 0.928   |
|                      | <i>Synechococcus</i> abundance   | 0.549            | 0.015   | -0.233            | 0.520   | 0.035            | 0.873   | -0.157            | 0.583   |
|                      | Total Bacteria                   | 0.676            | 0.004   | 0.533             | 0.124   | -0.082           | 0.773   | 0.0596            | 0.832   |
|                      | Picoeukaryote abundance          | 0.721            | < 0.001 | -0.4              | 0.75    | 0.583            | 0.004   | -0.208            | 0.338   |
|                      | Total Chlorophyll (.22 μm)       | 0.769            | < 0.001 | 0.236             | 0.490   | -0.058           | 0.788   | 0.307             | 0.279   |
|                      | Chlorophyll (.8 μm)              | 0.943            | < 0.001 | < 0.001           | 0.983   | -0.020           | 0.934   | 0.756             | 0.021   |
| Secondary Production | 0.253                            | 0.390            | 0.297   | 0.384             | -0.222  | 0.316            | 0.155   | 0.603             |         |
| Nutrients            | PO <sub>4</sub>                  | 0.767            | < 0.001 | -0.356            | 0.331   | 0.717            | <0.001  | 0.130             | 0.656   |
|                      | SiOH <sub>4</sub>                | 0.581            | 0.011   | 0.238             | 0.434   | -0.103           | 0.210   | -0.249            | 0.403   |
|                      | NO <sub>2</sub>                  | 0.566            | 0.009   | BDL               | BDL     | 0.210            | 0.331   | 0.035             | 0.904   |
|                      | NO <sub>3</sub>                  | 0.825            | <0.001  | 0.032             | 0.919   | 0.216            | 0.317   | -0.107            | 0.704   |
|                      | NH <sub>4</sub>                  | 0.836            | <0.001  | 0.018             | 0.946   | 0.391            | 0.071   | -0.078            | 0.785   |
