# Supplementary material for: Contrasting seasonal drivers of virus abundance and production in the North Pacific Ocean
Source: PubMed Central journal article supplement (PMC5589214; doi:10.1371/journal.pone.0184371), 2017-09-07
Supplement: pone.0184371.s002.pdf [file pone.0184371.s002.pdf]

| OTU            | Phyla                 | Class                 | Order                 | Family                | Genus                                          | Spearman Rho | P-value     |
|----------------|-----------------------|-----------------------|-----------------------|-----------------------|------------------------------------------------|--------------|-------------|
| 67             | Cyanobacteria         | Chloroplast           |                       |                       | Uncultured Picoeukaryote                       | 0.391        | 0.001       |
| 96             | Proteobacteria        | Alphaproteobacteria   | Rhodobacterales       | Rhodobacteraceae      | Unclassified                                   | 0.1          | 0.098       |
| 98             | Cyanobacteria         | Cyanobacteria         | SubsectionI           | FamilyI               | Marine Group                                   | 0.315        | 0.032       |
| 137            | Planctomycetes        | Planctomycetacia      | Planctomycetales      | Planctomycetaceae     | Bythopirellula                                 | 0.175        | 0.061       |
| 162            | Cyanobacteria         | Chloroplast           |                       |                       | <i>Braarudospaera bigelowii</i><br>Chloroplast | 0.313        | 0.02        |
| 191            | Proteobacteria        | Gammaproteobacteria   | Oceanospirillales     | Alcanivoracaceae      | Kangiella                                      | NA           | NA          |
| 216            | Firmicutes            | Bacilli               | Bacillales            |                       | Unclassified                                   | 0.285        | 0.01        |
| 241            | Unclassified Bacteria |                       |                       |                       | Unclassified                                   | 0.213        | 0.092       |
| 243            | Bacteroidetes         | Flavobacteriia        | Flavobacteriales      | Flavobacteriaceae     | Ulvibacter                                     | 0.289        | 0.042       |
| 253            | Unclassified Bacteria | Unclassified Bacteria | Unclassified Bacteria | Unclassified Bacteria | Unclassified                                   | 0.136        | 0.225       |
| 282            | Proteobacteria        | Gammaproteobacteria   | Oceanospirillales     | Oceanospirillaceae    | Pseudospirillum                                | 0.401        | 0.007       |
| 396            | Unclassified Bacteria |                       |                       |                       |                                                | -0.068       | 0.557       |
| 400            | Chloroflexi           | SAR202 clade          |                       |                       | Unclassified                                   | 0.041        | 0.27        |
| 407            | Bacteroidetes         | Sphingobacteriia      | Sphingobacteriales    | Saprosiraceae         | Unclassified                                   | Na           | NA          |
| 548            | Cyanobacteria         | Chloroplast           |                       |                       | Uncultured Eukaryote<br>Chloroplast DNA        | 0.279        | 0.053       |
| 611            | Proteobacteria        | Betaproteobacteria    |                       |                       | Unclassified                                   | 0.272        | 0.04        |
| 700            | Euryarchaeota         | Thermoplasmata        | Thermoplasmatales     | Marine_Group_II       | Unclassified                                   | NA           | NA          |
| 845            | Unclassified Bacteria |                       |                       |                       | Unclassified                                   | NA           | NA          |
| 887            | Proteobacteria        | Gammaproteobacteria   | Alteromonadales       | Colwelliaceae         | Colwellia                                      | 0.145        | 0.217       |
| <b>OVERALL</b> |                       |                       |                       |                       |                                                | <b>0.592</b> | <b>0.02</b> |
