# Supplementary material for: Contrasting seasonal drivers of virus abundance and production in the North Pacific Ocean
Source: PubMed Central journal article supplement (PMC5589214; doi:10.1371/journal.pone.0184371), 2017-09-07
Supplement: pone.0184371.s003.pdf [file pone.0184371.s003.pdf]

| OTU            | Phyla          | Class               | Order              | Family              | Genus                                       | Spearman Rho | P-value      |
|----------------|----------------|---------------------|--------------------|---------------------|---------------------------------------------|--------------|--------------|
| 90             | Proteobacteria | Alphaproteobacteria | Rhodospirillales   | Rhodospirillaceae   | <i>OM75 clade</i>                           | 0.389        | 0.007        |
| 102            | Planctomycetes | Planctomycetacia    | Planctomycetales   | Planctomycetaceae   | <i>Rubripirellula</i>                       | 0.037        | 0.322        |
| 126            | Planctomycetes | Phycisphaerae       | Phycisphaerales    | Phycisphaeraceae    | <i>FS140-16B-02 marine group</i>            | -0.041       | .0563        |
| 131            | Bacteroidetes  | Sphingobacteriia    | Sphingobacteriales | Sphingobacteriaceae | <i>Pedobacter</i>                           | 0.043        | 0.344        |
| 162            | Cyanobacteria  | Chloroplast         |                    |                     | <i>Braarudospaera bigelowii</i> Chloroplast | 0.26         | 0.036        |
| 166            | Planctomycetes | Planctomycetacia    | Planctomycetales   | Planctomycetaceae   | <i>Pirellula</i>                            | 0.255        | 0.077        |
| 219            | Proteobacteria | Alphaproteobacteria | Rhodospirillales   |                     | Unclassified                                | NA           | NA           |
| 227            | Proteobacteria | Gammaproteobacteria |                    |                     | Unclassified                                | 0.058        | 0.268        |
| 238            | Cyanobacteria  | Chloroplast         |                    |                     | Uncultured Eukaryote Chloroplast DNA        | 0.221        | 0.136        |
| 266            |                |                     |                    |                     | Unclassified                                | 0            | 0.709        |
| 308            | Proteobacteria | Deltaproteobacteria | Oligoflexales      | Oligoflexaceae      | Unclassified                                | 0            | 0.684        |
| 323            | Bacteroidetes  | Flavobacteriia      | Flavobacteriales   | Flavobacteriaceae   | <i>Joostella</i>                            | 0.256        | 0.034        |
| 399            | Proteobacteria | Alphaproteobacteria | E6aD10             |                     | Unclassified                                | NA           | NA           |
| 447            | Cyanobacteria  | Cyanobacteria       | Subsection I       | FamilyI             | <i>Cyanothece</i>                           | 0.255        | 0.063        |
| 548            | Cyanobacteria  | Chloroplast         |                    |                     | Uncultured Eukaryote Chloroplast DNA        | 0.491        | 0.001        |
| <b>Overall</b> |                |                     |                    |                     |                                             | <b>0.72</b>  | <b>0.001</b> |
