# Supplementary material for: Contrasting seasonal drivers of virus abundance and production in the North Pacific Ocean
Source: PubMed Central journal article supplement (PMC5589214; doi:10.1371/journal.pone.0184371), 2017-09-07
Supplement: pone.0184371.s004.pdf [file pone.0184371.s004.pdf]

| Otu      | Taxonomy Name                       | E-Value   | Sim     | Accession  |
|----------|-------------------------------------|-----------|---------|------------|
| Otu00023 | <i>Helicopedinella sp. RCC2284</i>  | 8.44E-115 | 100.00% | LN735338.3 |
| Otu00036 | <i>Bacillariophyta sp. 867-32</i>   | 2.84E-118 | 99.10%  | KP792487.1 |
| Otu00054 | <i>Emiliana huxleyi</i>             | 2.84E-118 | 99.10%  | JN022705.1 |
| Otu00062 | Uncultured Marine Eukaryote         | 5.22E-120 | 99.60%  | KX938088.1 |
| Otu00064 | <i>Phaeocystis globosa</i>          | 5.90E-116 | 99.10%  | KC900889.1 |
| Otu00067 | Uncultured Picoeukaryote            | 4.60E-113 | 97.80%  | JX291751.1 |
| Otu00079 | Uncultured Dictyochophyte           | 1.55E-116 | 98.70%  | EF052136.1 |
| Otu00086 | <i>Virgulinema fragilis</i>         | 1.55E-116 | 98.70%  | JN207213.1 |
| Otu00097 | Uncultured Marine Eukaryote         | 2.84E-118 | 99.10%  | KX935068.1 |
| Otu00100 | <i>Planoglabratella opercularis</i> | 1.37E-109 | 97.00%  | KP792467.1 |
| Otu00113 | <i>Florenciella parvula</i>         | 1.55E-116 | 99.10%  | LN735274.2 |
| Otu00116 | Uncultured Chrysophyte              | 2.84E-118 | 99.10%  | EF052163.1 |
| Otu00120 | Uncultured Marine Eukaryote         | 8.44E-115 | 98.30%  | KX937565.1 |
| Otu00158 | Uncultured Haptophyte               | 8.44E-115 | 98.30%  | EF052065.1 |
| Otu00162 | <i>Braarudosphaera bigelowii</i>    | 2.84E-118 | 99.10%  | AB847986.2 |
| Otu00218 | Uncultured Chrysophyte              | 2.84E-118 | 99.10%  | EF052251.1 |
| Otu00234 | <i>Asterionella formosa</i>         | 4.06E-106 | 96.10%  | KC509519.1 |
| Otu00238 | <i>Prasinophyceae sp. RCC999</i>    | 1.75E-112 | 98.30%  | LN735517.3 |
| Otu00242 | <i>Proboscia inermis</i>            | 2.79E-96  | 94.40%  | FJ002201.1 |
| Otu00255 | Uncultured Marine Eukaryote         | 3.55E-110 | 97.80%  | KX937647.1 |
| Otu00260 | Uncultured Marine Eukaryote         | 5.22E-120 | 99.60%  | KX938009.1 |
| Otu00268 | Uncultured Marine Eukaryote         | 5.82E-116 | 100.00% | KX938202.1 |
| Otu00270 | Eukaryote SCGC AAA074-P04           | 2.51E-111 | 97.40%  | JF488733.1 |
| Otu00276 | <i>Virgulinema fragilis</i>         | 4.60E-113 | 97.80%  | KP792491.1 |
| Otu00284 | <i>Ralstonia solanacearum</i>       | 2.51E-111 | 97.40%  | CP011998.1 |
| Otu00319 | Uncultured Marine Eukaryote         | 2.21E-104 | 96.10%  | KX938047.1 |
| Otu00335 | <i>Rhizosolenia imbricata</i>       | 4.60E-113 | 97.80%  | KJ958482.1 |
| Otu00343 | <i>Proboscia indica</i>             | 8.44E-115 | 98.30%  | FJ002241.1 |
| Otu00344 | Uncultured Marine Eukaryote         | 1.55E-116 | 98.70%  | KX937668.1 |
| Otu00364 | <i>Syracosphaera pulchra</i>        | 1.20E-102 | 96.00%  | LN735258.2 |
| Otu00366 | <i>Calcidiscus quadriperforatus</i> | 2.51E-111 | 97.40%  | LN735221.2 |
| Otu00370 | Uncultured Chrysophyte              | 3.16E-103 | 96.10%  | EF052251.1 |
| Otu00379 | <i>Actaea racemosa</i>              | 1.07E-117 | 99.60%  | KY085920.1 |
| Otu00395 | <i>Teleaulax amphioxeia</i>         | 4.62E-113 | 99.10%  | KX816862.1 |
| Otu00423 | Uncultured Diatom                   | 1.21E-102 | 95.30%  | KX938043.1 |
| Otu00494 | <i>Virgulinema fragilis</i>         | 2.51E-111 | 97.40%  | JN207220.1 |
| Otu00502 | Uncultured Chrysophyte              | 5.22E-120 | 99.60%  | KX938184.1 |
| Otu00530 | <i>Chaetoceros calcitrans</i>       | 8.44E-115 | 98.30%  | LN735292.2 |
| Otu00531 | <i>Thalassionema sp. CCMP1100</i>   | 4.06E-106 | 96.10%  | FJ002197.1 |
| Otu00534 | Uncultured marine eukaryote         | 2.84E-118 | 99.10%  | KX934876.1 |
| Otu00548 | Eukaryote SCGC AAA074-K22           | 8.44E-115 | 98.30%  | JF488711.1 |
| Otu00549 | <i>Pelagomonas sp. RCC986</i>       | 1.21E-113 | 100.00% | LN735511.3 |
| Otu00565 | <i>Thalassionema sp. CCMP1100</i>   | 1.37E-109 | 97.00%  | FJ002197.1 |
| Otu00573 | <i>Planoglabratella opercularis</i> | 4.60E-113 | 97.80%  | KP792480.1 |
| Otu00581 | Uncultured Phototrophic Eukaryote   | 1.55E-116 | 98.70%  | KP792480.1 |

|                 |                               |           |        |            |
|-----------------|-------------------------------|-----------|--------|------------|
| <b>Otu00585</b> | Uncultured Marine Eukaryote   | 4.60E-113 | 97.80% | KX938161.1 |
| <b>Otu00602</b> | <i>Rhizosolenia imbricata</i> | 2.21E-104 | 95.70% | KJ958482.1 |
| <b>Otu00624</b> | Uncultured Marine Eukaryote   | 1.55E-116 | 98.70% | KX937932.1 |
| <b>Otu00636</b> | <i>Helicosphaera carteri</i>  | 8.44E-115 | 98.30% | LN735234.2 |
