# Supplementary material for: Contrasting seasonal drivers of virus abundance and production in the North Pacific Ocean
Source: PubMed Central journal article supplement (PMC5589214; doi:10.1371/journal.pone.0184371), 2017-09-07

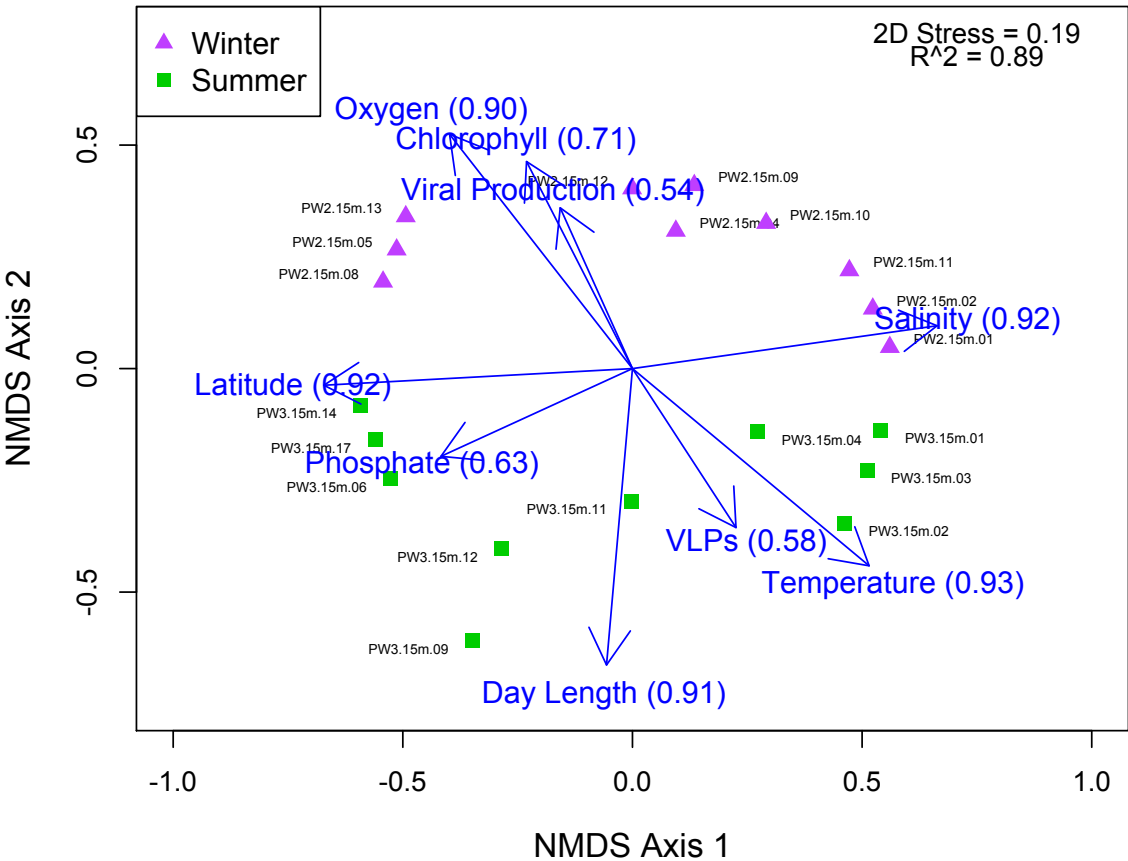

Supplement: pone.0184371.s005.pdf [file pone.0184371.s005.pdf]
